# Supplementary material for: Semi-carbonized nanostructures of carbohydrate for highly efficient photocatalysts
Source: Royal Society of Chemistry journal article supplement (doi:10.1039/c5ra11408j), 2015-01-01
Supplement: c5ra11408j1.pdf [file c5ra11408j1.pdf]

## Semi-carbonized nanostructures of carbohydrate for high efficient photocatalysts

### Supporting Information

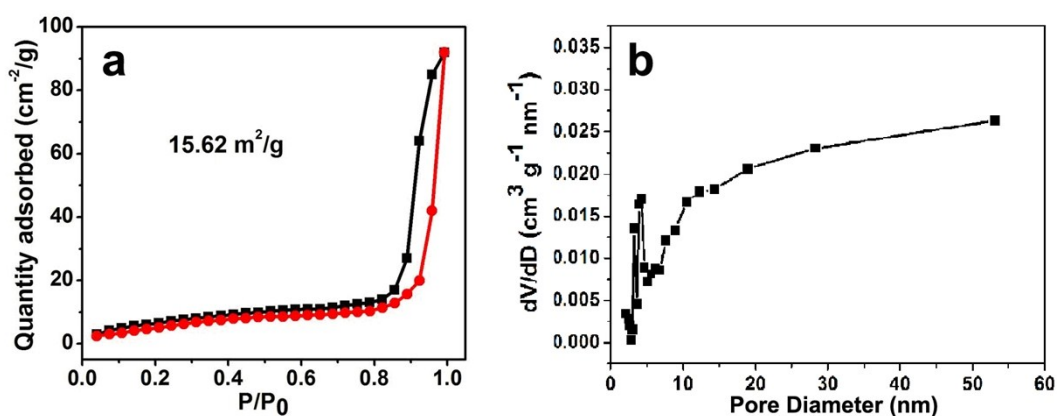

**Fig. S1** (a and b) Nitrogen adsorption-desorption isotherms and corresponding pore size distribution of colloidal silica beads.

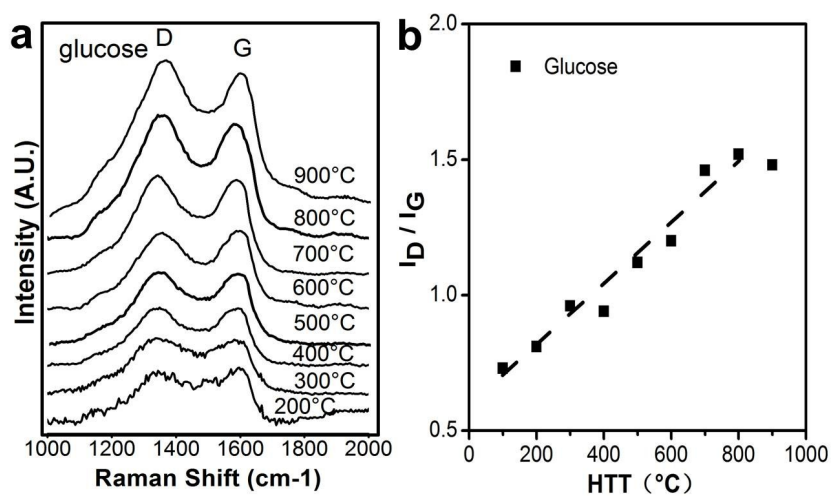

**Fig. S2** The Raman spectra (intensity versus Raman shift) and  $I_D/I_G$  ratios as a function of HTT for glucose.

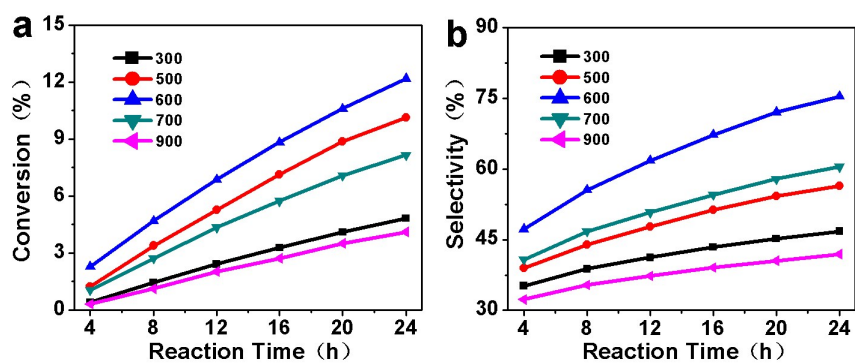

**Fig. S3** Reaction profiles of the selective oxidation of *cis*-cyclooctene: (a) The conversion of *cis*-cyclooctene with G-3DMPCS-300, G-3DMPCS-500, G-3DMPCS-600, G-3DMPCS-700 and G-3DMPCS-900 as catalysts. (b) The selectivity of 2-hydroxycyclooctanone with G-3DMPCS-300, G-3DMPCS-500, G-3DMPCS-600, G-3DMPCS-700 and G-3DMPCS-900 as catalysts.

**Table S1.** Photocatalytic activities for the selective oxidation of *cis*-cyclooctene by different semi-carbonized carbohydrate with (+) or without (-) light ( $\lambda \geq 420$  nm) irradiation

| Sample              | Conversion / %<br>(+/-) | Selectivity / %                                                                   |                                                                                     |                                                                                     |
|---------------------|-------------------------|-----------------------------------------------------------------------------------|-------------------------------------------------------------------------------------|-------------------------------------------------------------------------------------|
|                     |                         | 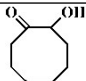 | 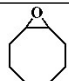 | 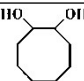 |
| C-3DMPCS-0          | 17.8 / 11.3             | 50.3                                                                              | 30.6                                                                                | 18.8                                                                                |
| C-3DMPCS-100        | 13.7 / 10.5             | 46.8                                                                              | 31.5                                                                                | 20.7                                                                                |
| C-3DMPCS-200        | 10.1 / 8.5              | 40.1                                                                              | 32.4                                                                                | 27.4                                                                                |
| C-3DMPCS-300        | 13.1 / 6.6              | 66.5                                                                              | 21.5                                                                                | 10.8                                                                                |
| C-3DMPCS-400        | 21.1 / 7.2              | 78.8                                                                              | 10.2                                                                                | 8.6                                                                                 |
| <b>C-3DMPCS-500</b> | <b>32.6 / 13.6</b>      | <b>90.4</b>                                                                       | <b>5.3</b>                                                                          | <b>3.8</b>                                                                          |
| C-3DMPCS-600        | 15.9 / 8.4              | 61.1                                                                              | 21.4                                                                                | 17.2                                                                                |
| C-3DMPCS-700        | 5.2 / 1.8               | 53.2                                                                              | 28.5                                                                                | 17.4                                                                                |
| C-3DMPCS-800        | 4.8 / 1.2               | 44.2                                                                              | 30.3                                                                                | 22.9                                                                                |
| C-3DMPCS-900        | 4.6 / 0.9               | 43.5                                                                              | 31.1                                                                                | 24.5                                                                                |
| G-3DMPCS-200        | 2.3 / 0.8               | 42.3                                                                              | 30.2                                                                                | 25.3                                                                                |
| G-3DMPCS-300        | 4.8 / 1.2               | 46.8                                                                              | 29.8                                                                                | 22.4                                                                                |
| G-3DMPCS-400        | 5.9 / 2.6               | 48.9                                                                              | 25.1                                                                                | 24.6                                                                                |
| G-3DMPCS-500        | 10.1 / 5.3              | 56.4                                                                              | 22.2                                                                                | 20.6                                                                                |
| <b>G-3DMPCS-600</b> | <b>12.2 / 6.8</b>       | <b>75.4</b>                                                                       | <b>14.5</b>                                                                         | <b>9.1</b>                                                                          |
| G-3DMPCS-700        | 8.2 / 5.1               | 60.5                                                                              | 23.3                                                                                | 15.2                                                                                |
| G-3DMPCS-800        | 6.5 / 3.5               | 55.7                                                                              | 24.8                                                                                | 19.4                                                                                |
| G-3DMPCS-900        | 4.1 / 2.1               | 41.9                                                                              | 31.8                                                                                | 24.7                                                                                |

Reaction conditions: as-synthesized catalysts (0.1 g), *cis*-cyclooctene (10 mL), TBHP (0.12 g), 80 °C, under visible light irradiation. The TBHP was used as a radical initiator and oxygen (in the air) as an oxidant. All reactions were performed in a quartz three-neck flask. Reactants and catalysts were added into a three-neck flask equipped with a condenser. The reaction mixture was vigorously stirred at low temperatures, followed by visible light irradiation for 24 h (a 150 W Xe arc lamp with a CUT filter to cut off light of wavelength < 420 nm, but removed for experiments without irradiation). Conversion efficiencies were determined by GC with a FID detector.

**Table S2.** The comparisons of different carbon materials in photocatalytically selective oxidation of *cis*-cyclooctene.

| Sample        | Conversion / % | Selectivity / %                                                                     |                                                                                      |                                                                                       |
|---------------|----------------|-------------------------------------------------------------------------------------|--------------------------------------------------------------------------------------|---------------------------------------------------------------------------------------|
|               |                | 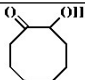 | 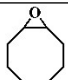 | 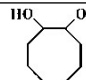 |
| C-3DMPCS-500  | 32.6           | 90.4                                                                                | 5.3                                                                                  | 3.8                                                                                   |
| G-3DMPCS-600  | 12.2           | 75.4                                                                                | 14.5                                                                                 | 9.1                                                                                   |
| Active carbon | 2.9            | 54.8                                                                                | 40.1                                                                                 | 2.1                                                                                   |
| Graphene      | 5.3            | 62.6                                                                                | 32.7                                                                                 | 2.7                                                                                   |
